# Supplementary material for: Synthesis of Enantiopure Reversed Structured Ether Lipids of the 1-O-Alkyl-sn-2,3-diacylglycerol Type
Source: MDPI journal article supplement (doi:10.3390/md13010173), 2015-01-07
Supplement: s1 [file s1]

## Supplementary Information

| Contents                                                                | Page Numbers |
|-------------------------------------------------------------------------|--------------|
| <sup>1</sup> H NMR (400 MHz, CDCl <sub>3</sub> ) of compound <b>4a</b>  | S2           |
| <sup>13</sup> C NMR (100 MHz, CDCl <sub>3</sub> ) of compound <b>4a</b> | S3           |
| Expanded <sup>1</sup> H NMR of compound <b>4a</b>                       | S4–S7        |
| <sup>1</sup> H NMR (400 MHz, CDCl <sub>3</sub> ) of compound <b>5b</b>  | S8           |
| <sup>13</sup> C NMR (100 MHz, CDCl <sub>3</sub> ) of compound <b>5b</b> | S9           |
| Expanded <sup>1</sup> H NMR of compound <b>5b</b>                       | S10–S13      |
| <sup>1</sup> H NMR (400 MHz, CDCl <sub>3</sub> ) of compound <b>6c</b>  | S14          |
| <sup>13</sup> C NMR (100 MHz, CDCl <sub>3</sub> ) of compound <b>6c</b> | S15          |
| <sup>1</sup> H NMR (400 MHz, CDCl <sub>3</sub> ) of compound <b>7d</b>  | S16          |
| <sup>13</sup> C NMR (100 MHz, CDCl <sub>3</sub> ) of compound <b>7d</b> | S17          |
| <sup>1</sup> H NMR (400 MHz, CDCl <sub>3</sub> ) of compound <b>8e</b>  | S18          |
| <sup>13</sup> C NMR (100 MHz, CDCl <sub>3</sub> ) of compound <b>8e</b> | S19          |
| <sup>1</sup> H NMR (400 MHz, CDCl <sub>3</sub> ) of compound <b>9f</b>  | S20          |
| <sup>13</sup> C NMR (100 MHz, CDCl <sub>3</sub> ) of compound <b>9f</b> | S21          |

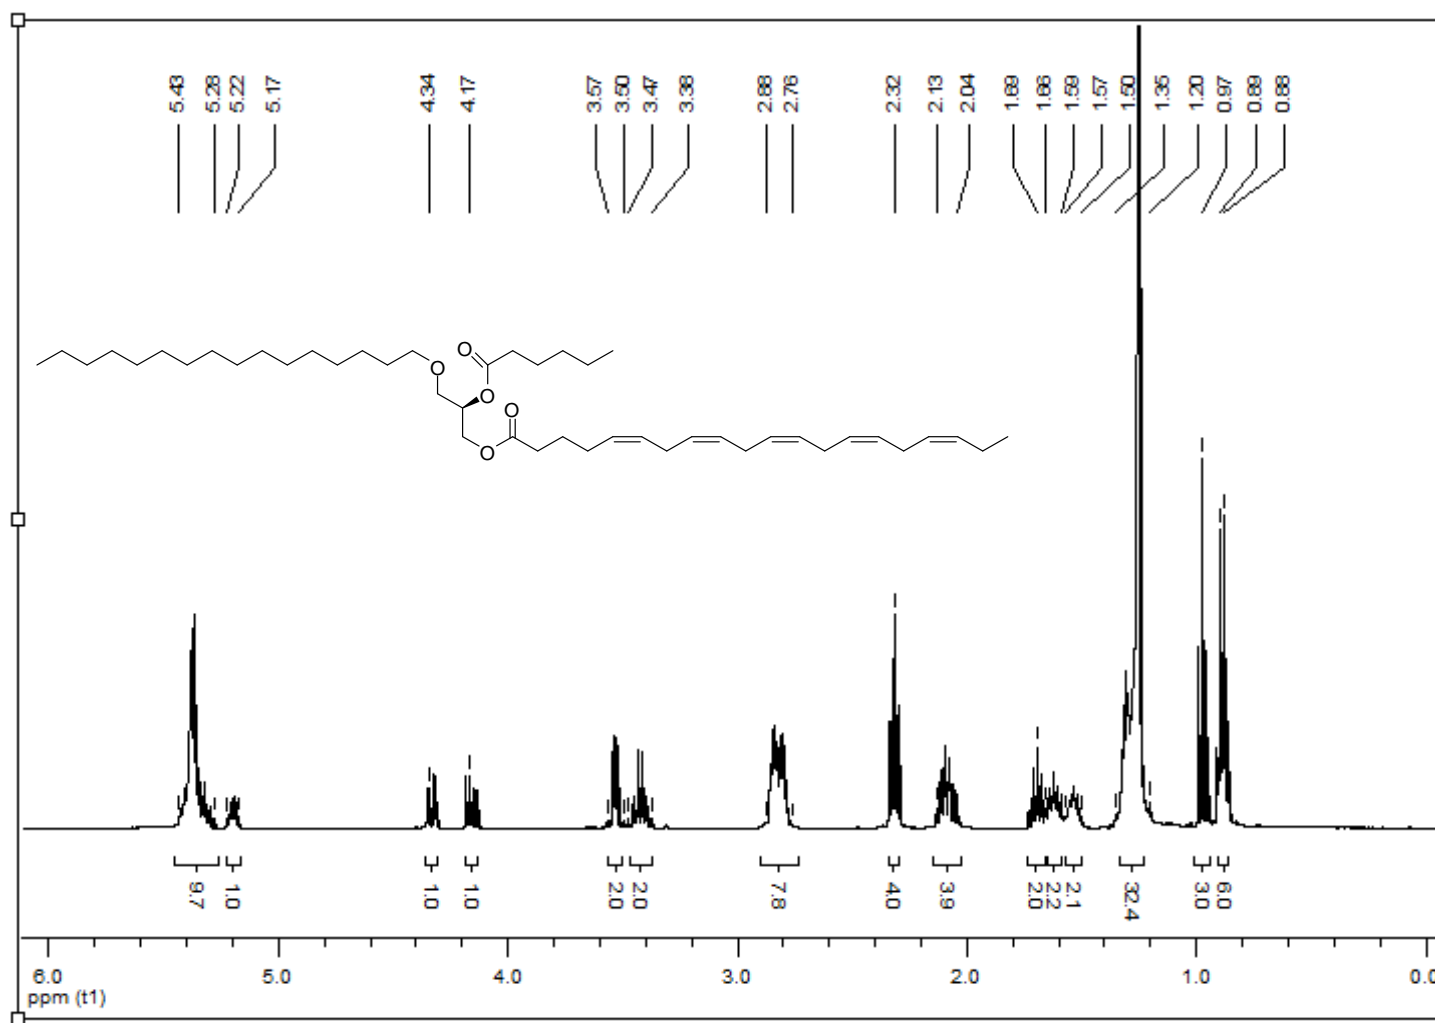

**Figure S1.** <sup>1</sup>H-NMR (CDCl<sub>3</sub>, 400 MHz) of compound 4a.

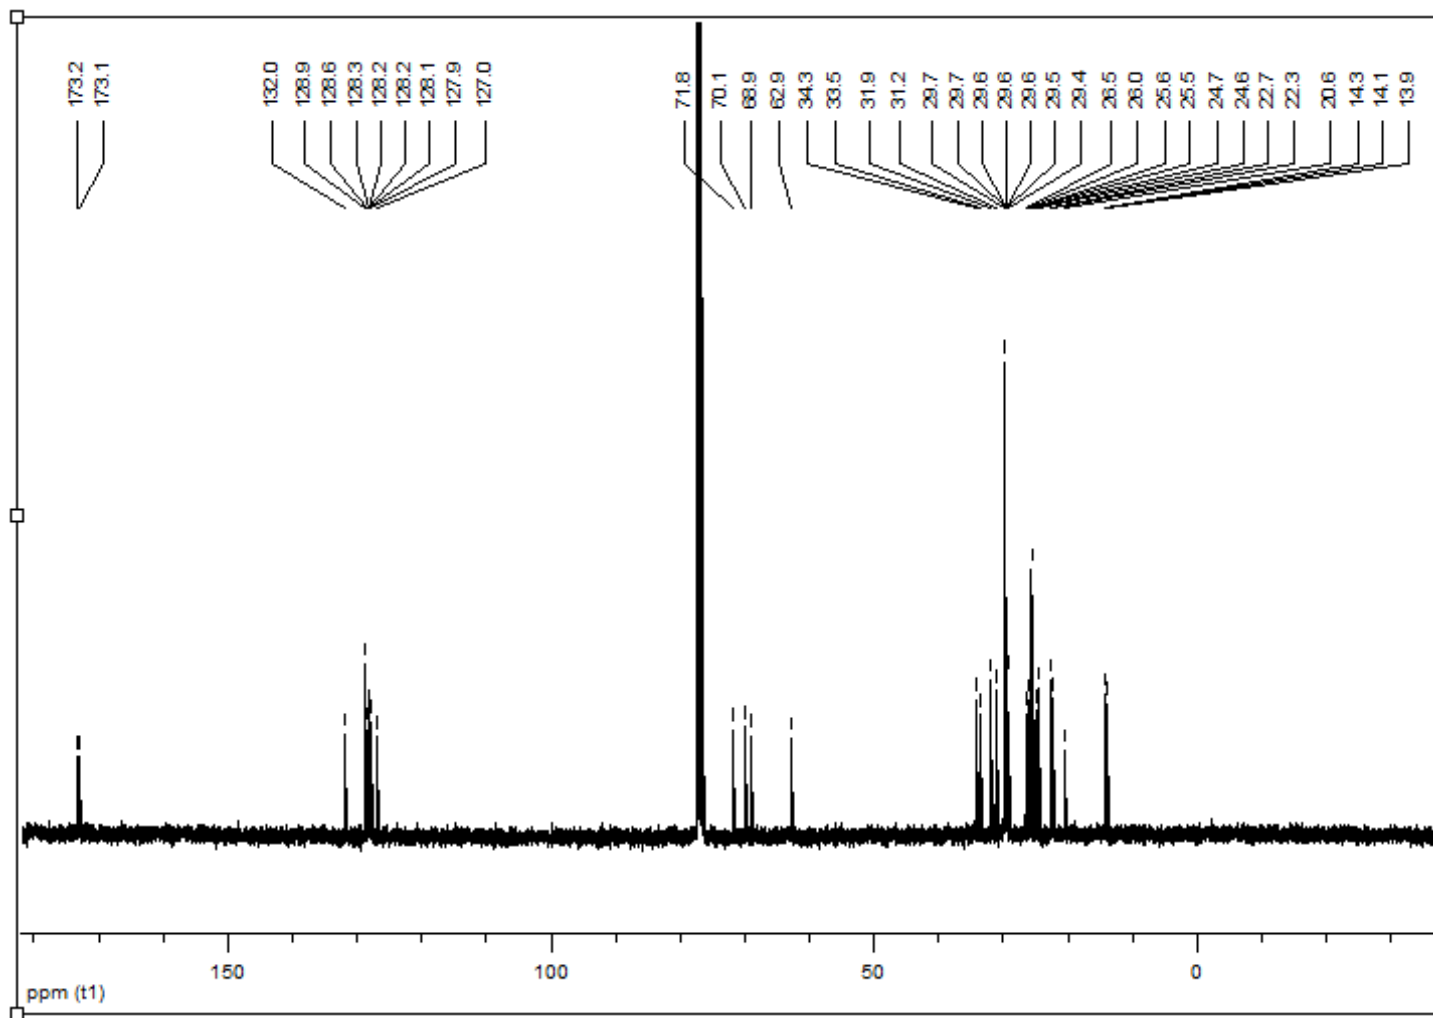

**Figure S2.**  $^{13}\text{C}$ -NMR ( $\text{CDCl}_3$ , 100 MHz) of compound 4a.

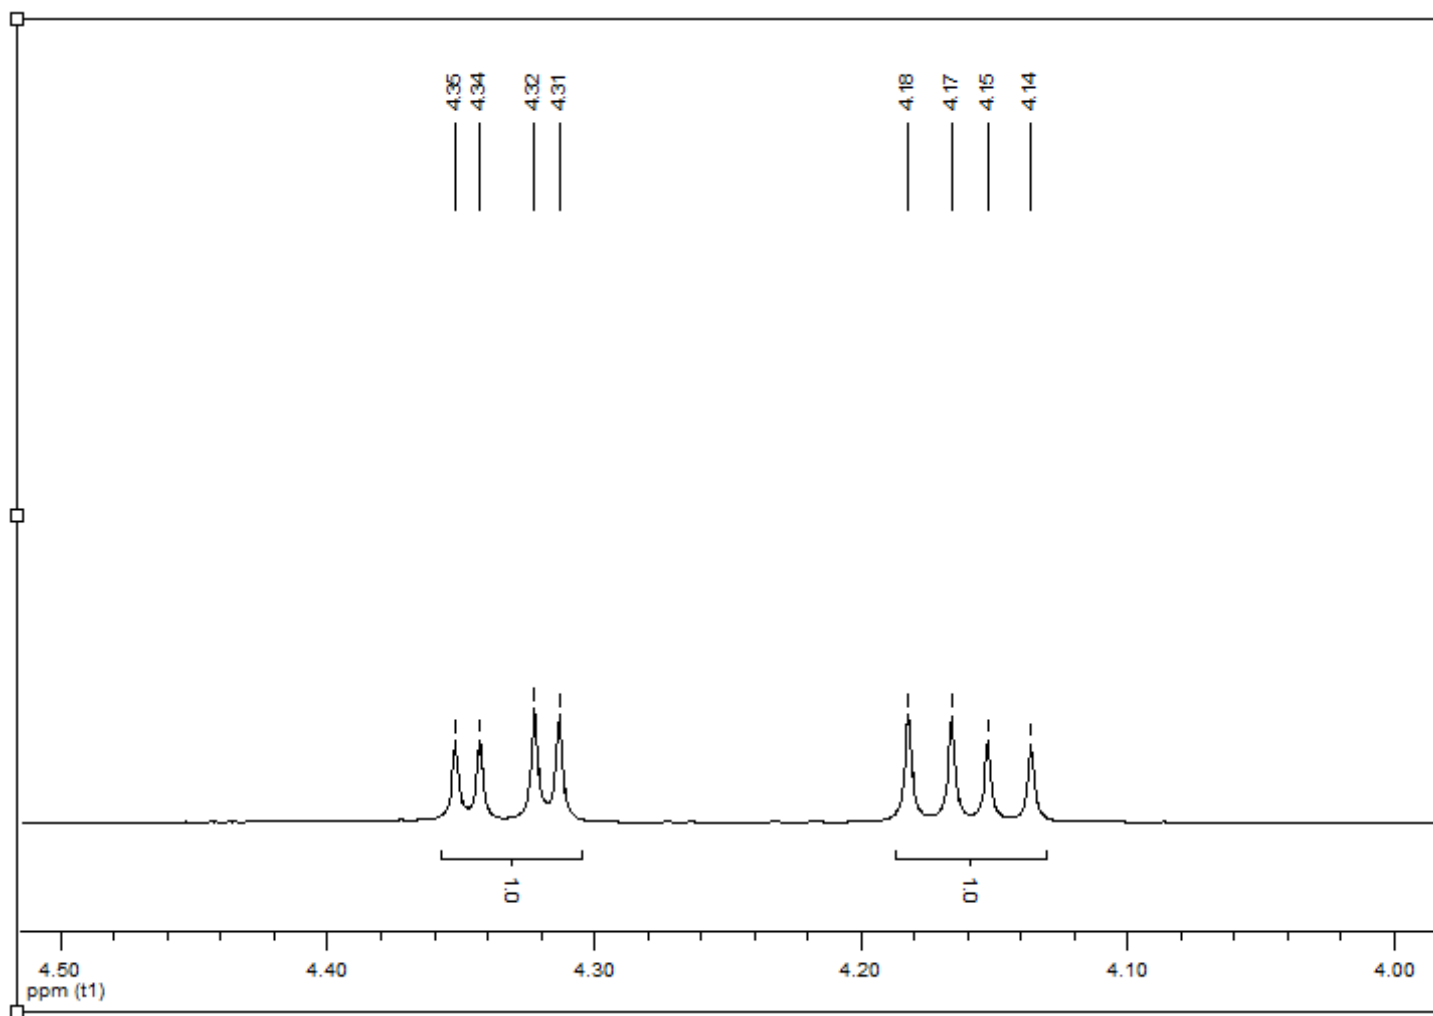

Figure S3. Cont.

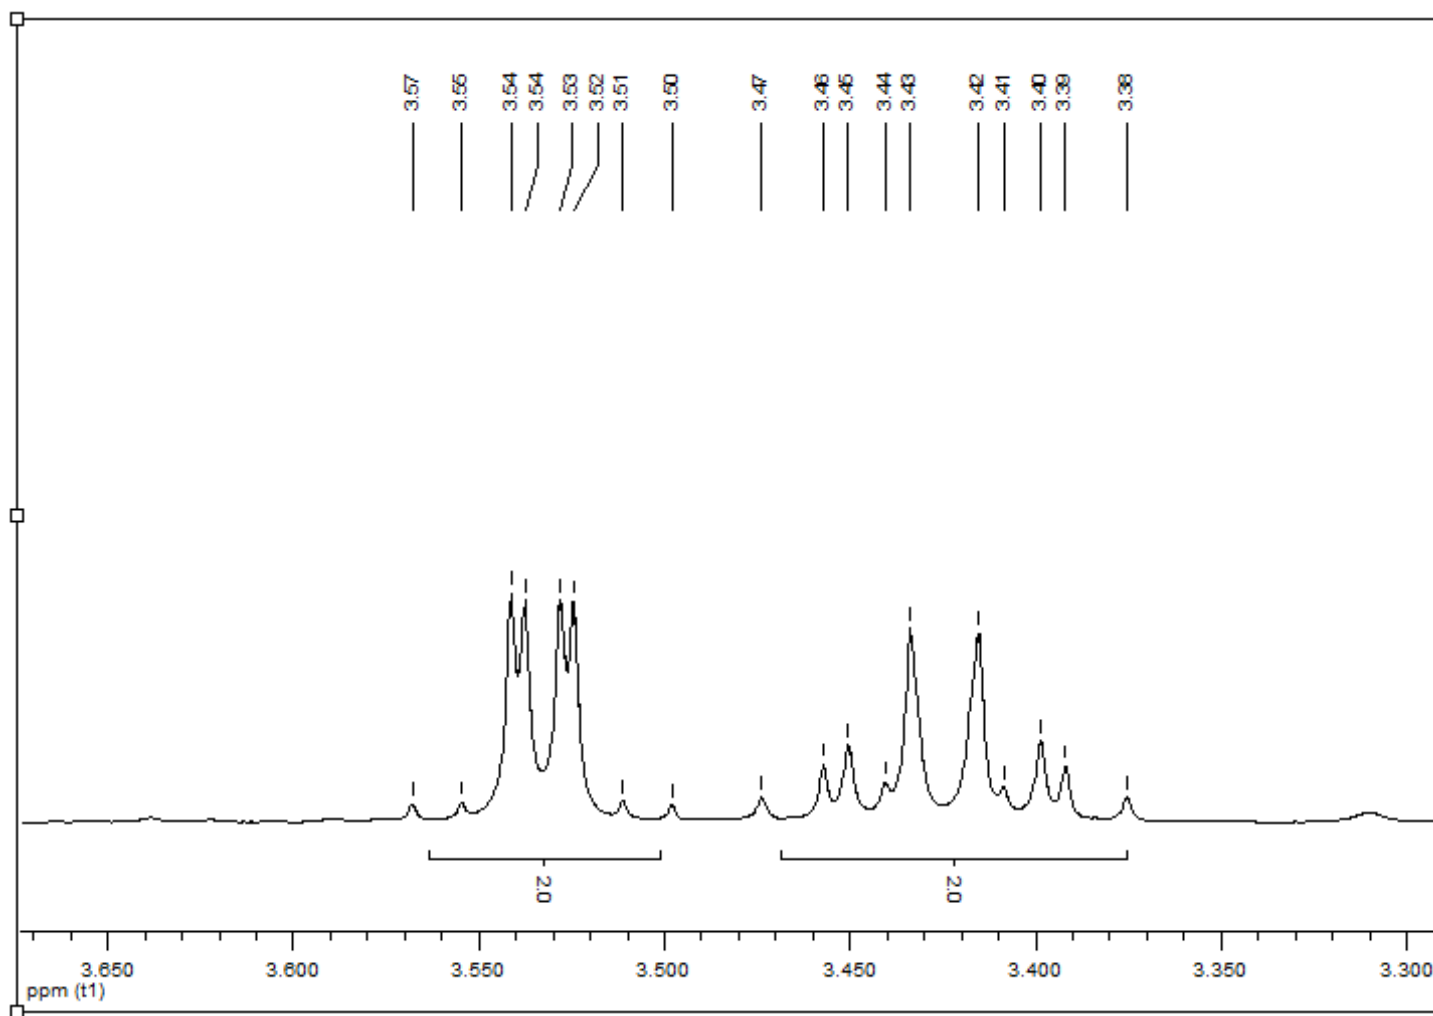

Figure S3. Cont.

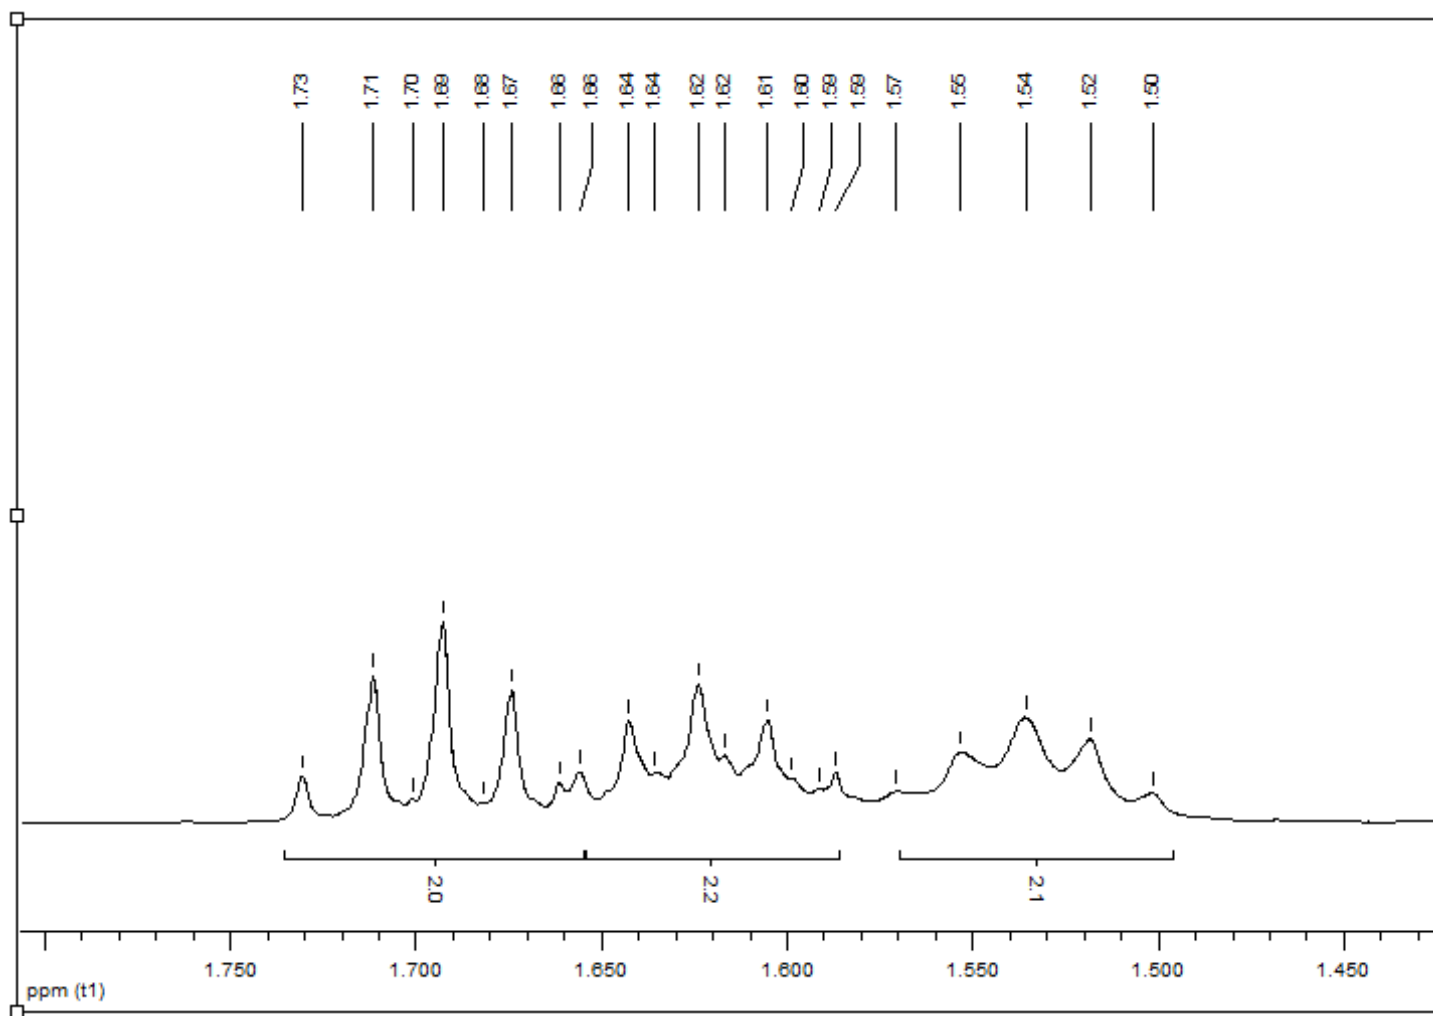

Figure S3. Cont.

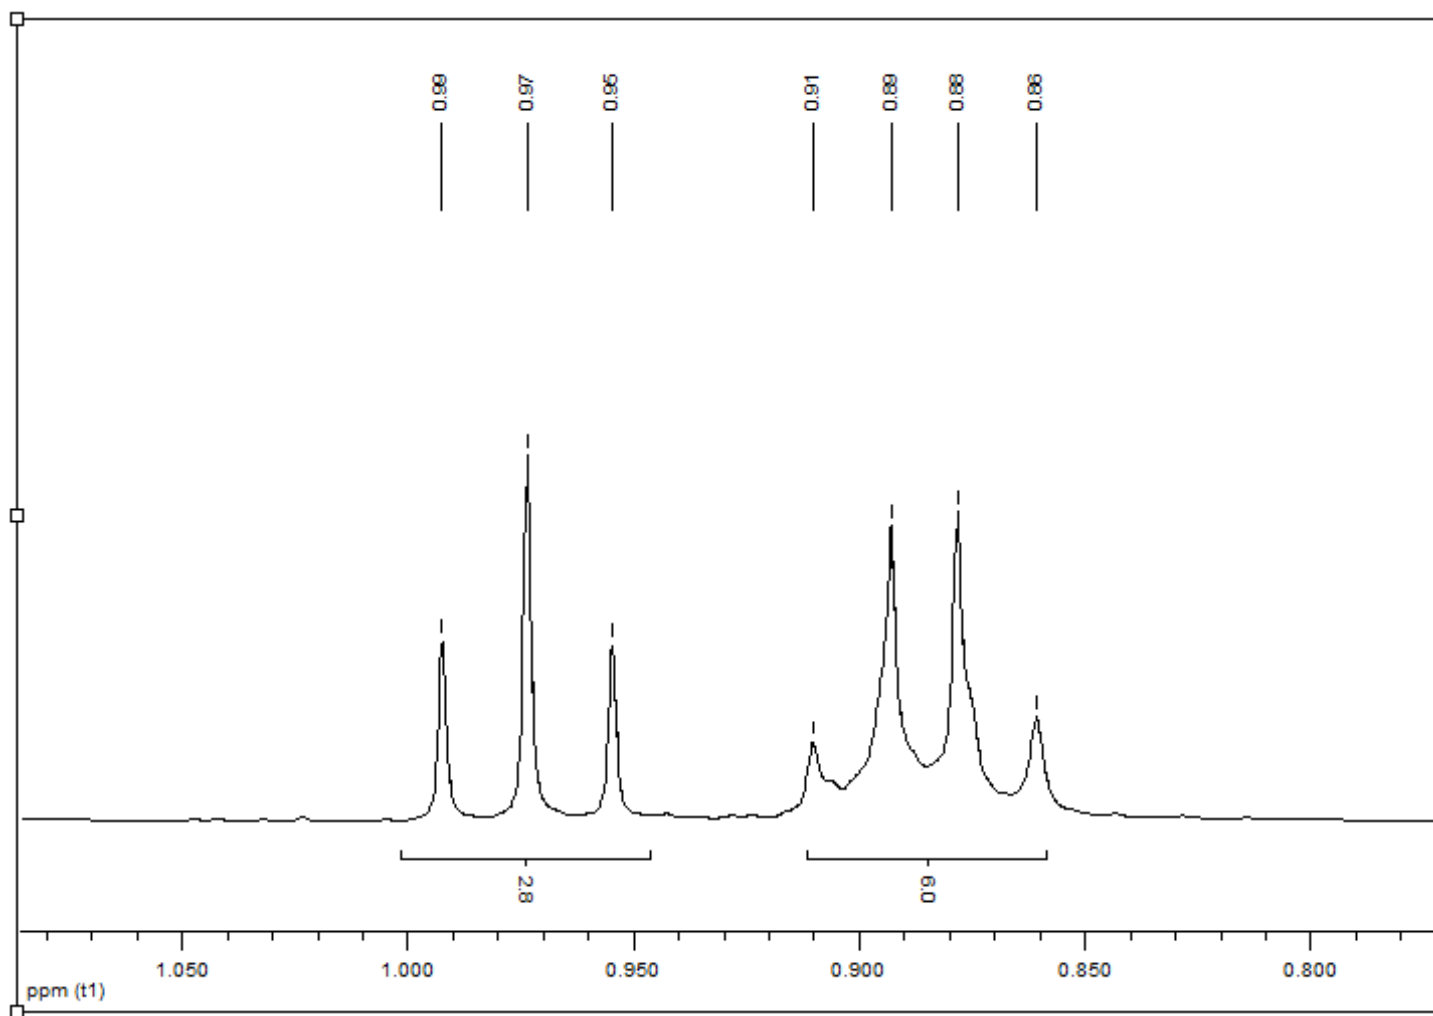

**Figure S3.** Expanded <sup>1</sup>H-NMR of compound **4a**.

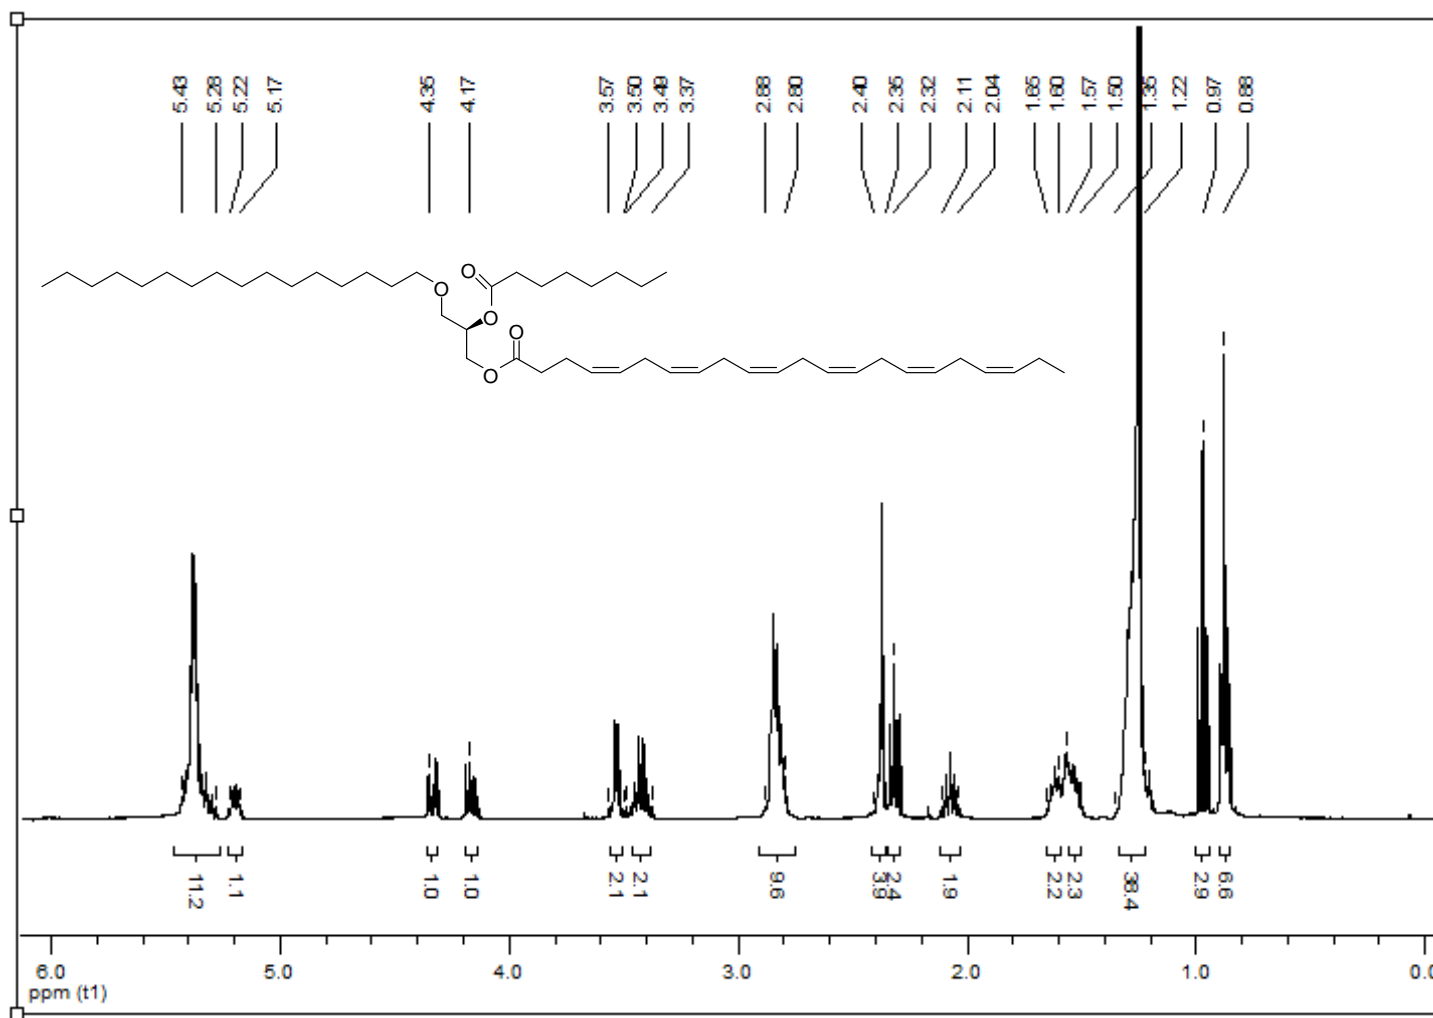

Figure S4. <sup>1</sup>H-NMR (CDCl<sub>3</sub>, 400 MHz) of compound 5b.



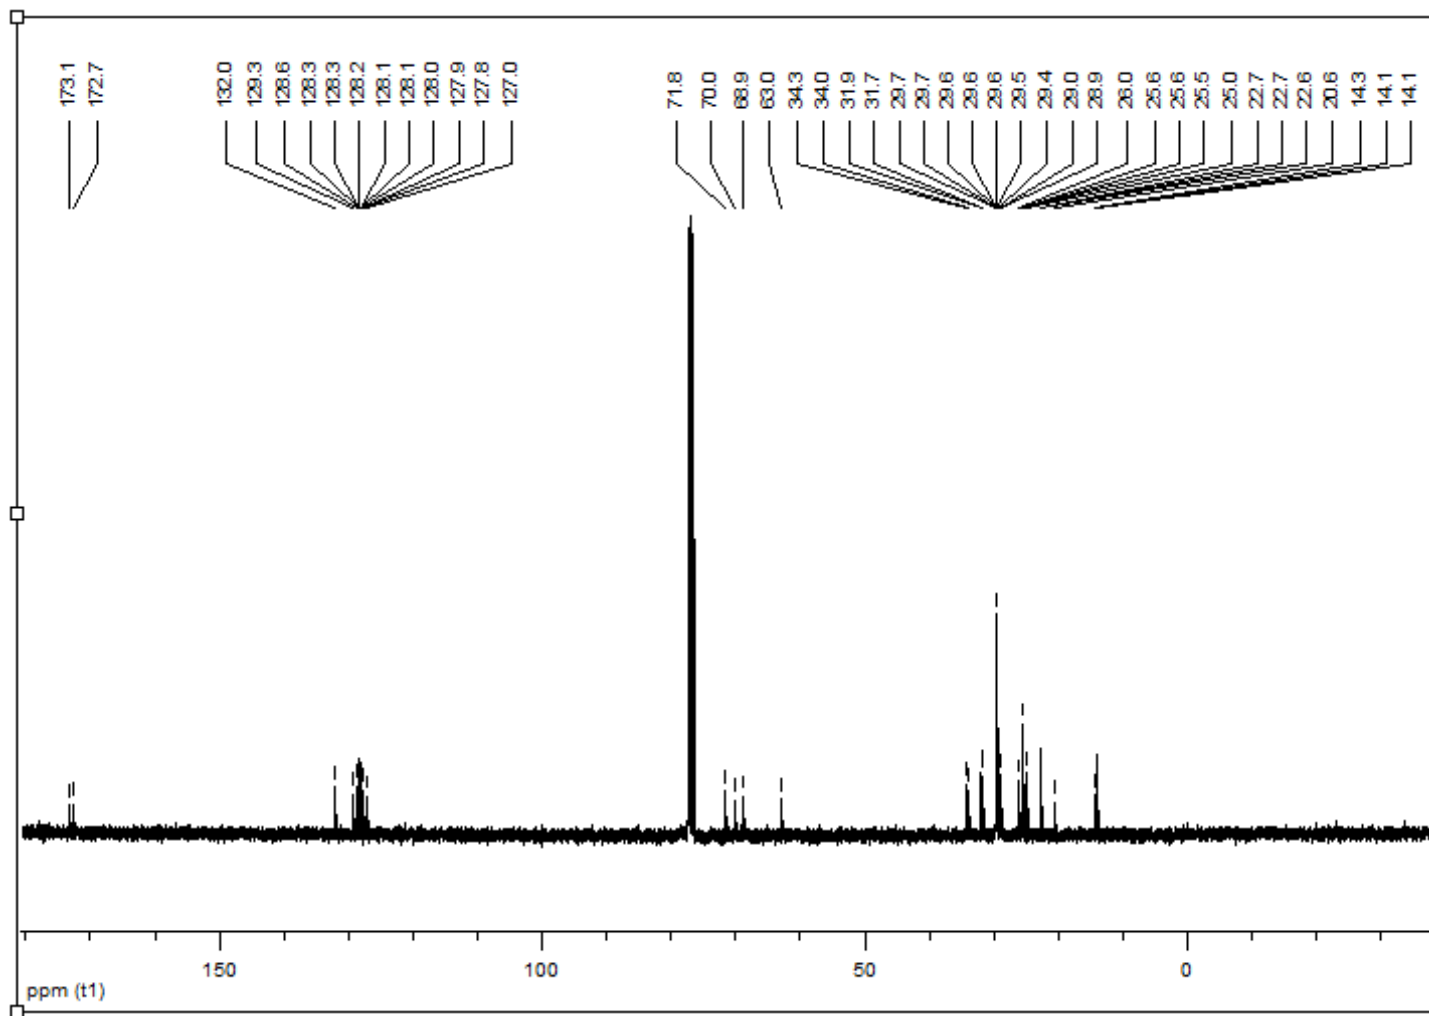

Figure S5.  $^{13}\text{C}$ -NMR ( $\text{CDCl}_3$ , 100 MHz) of compound **5b**.

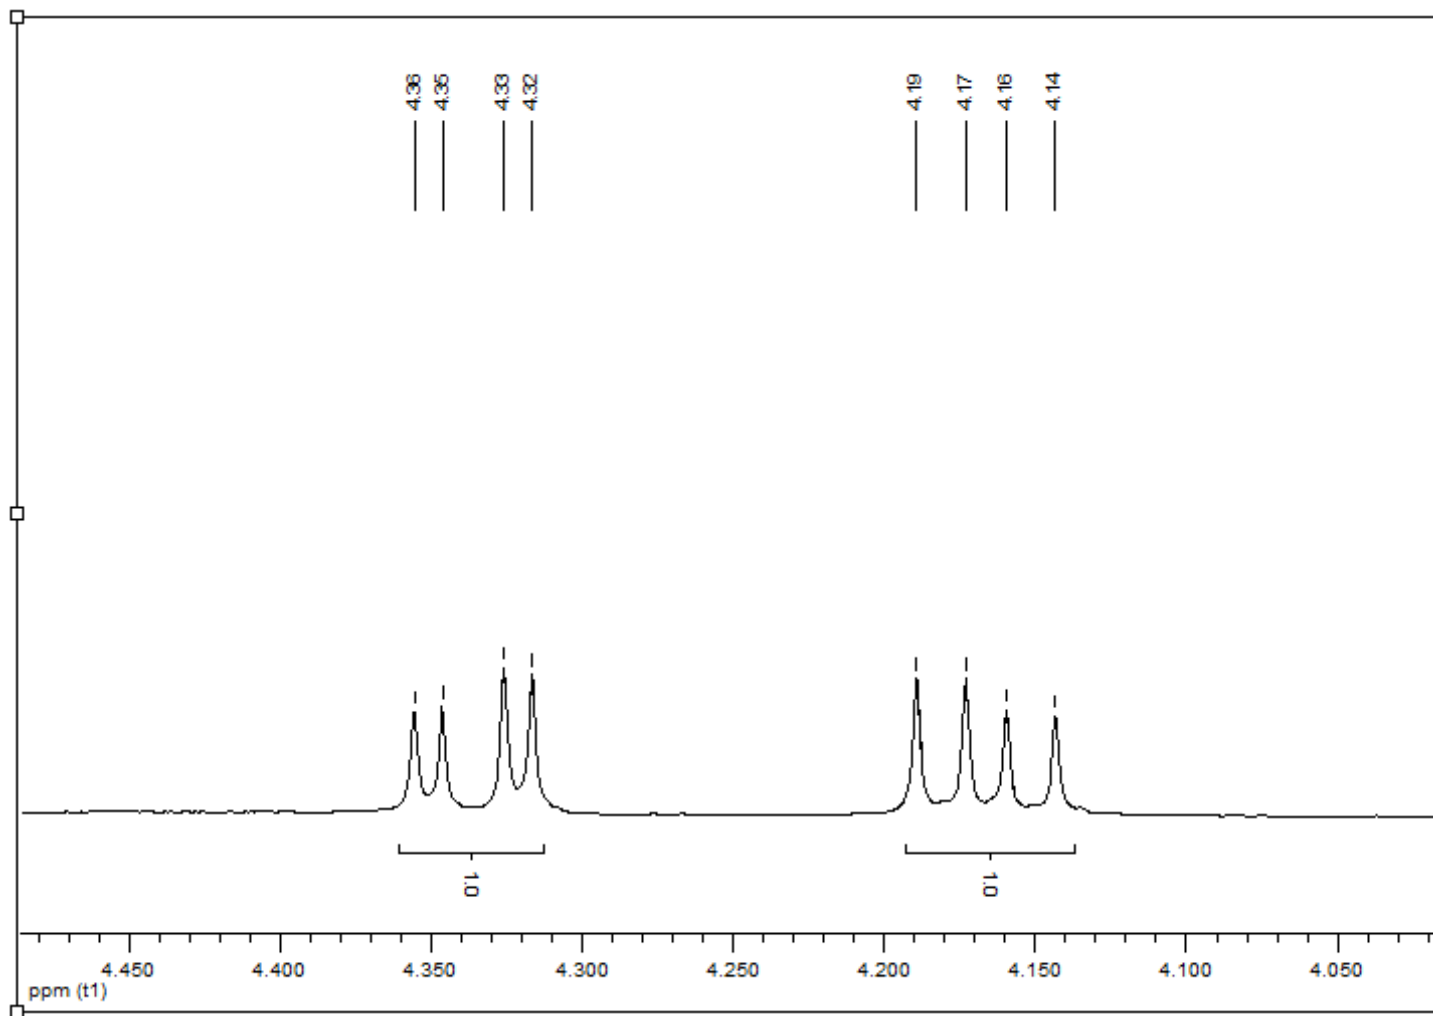

Figure S6. Cont.

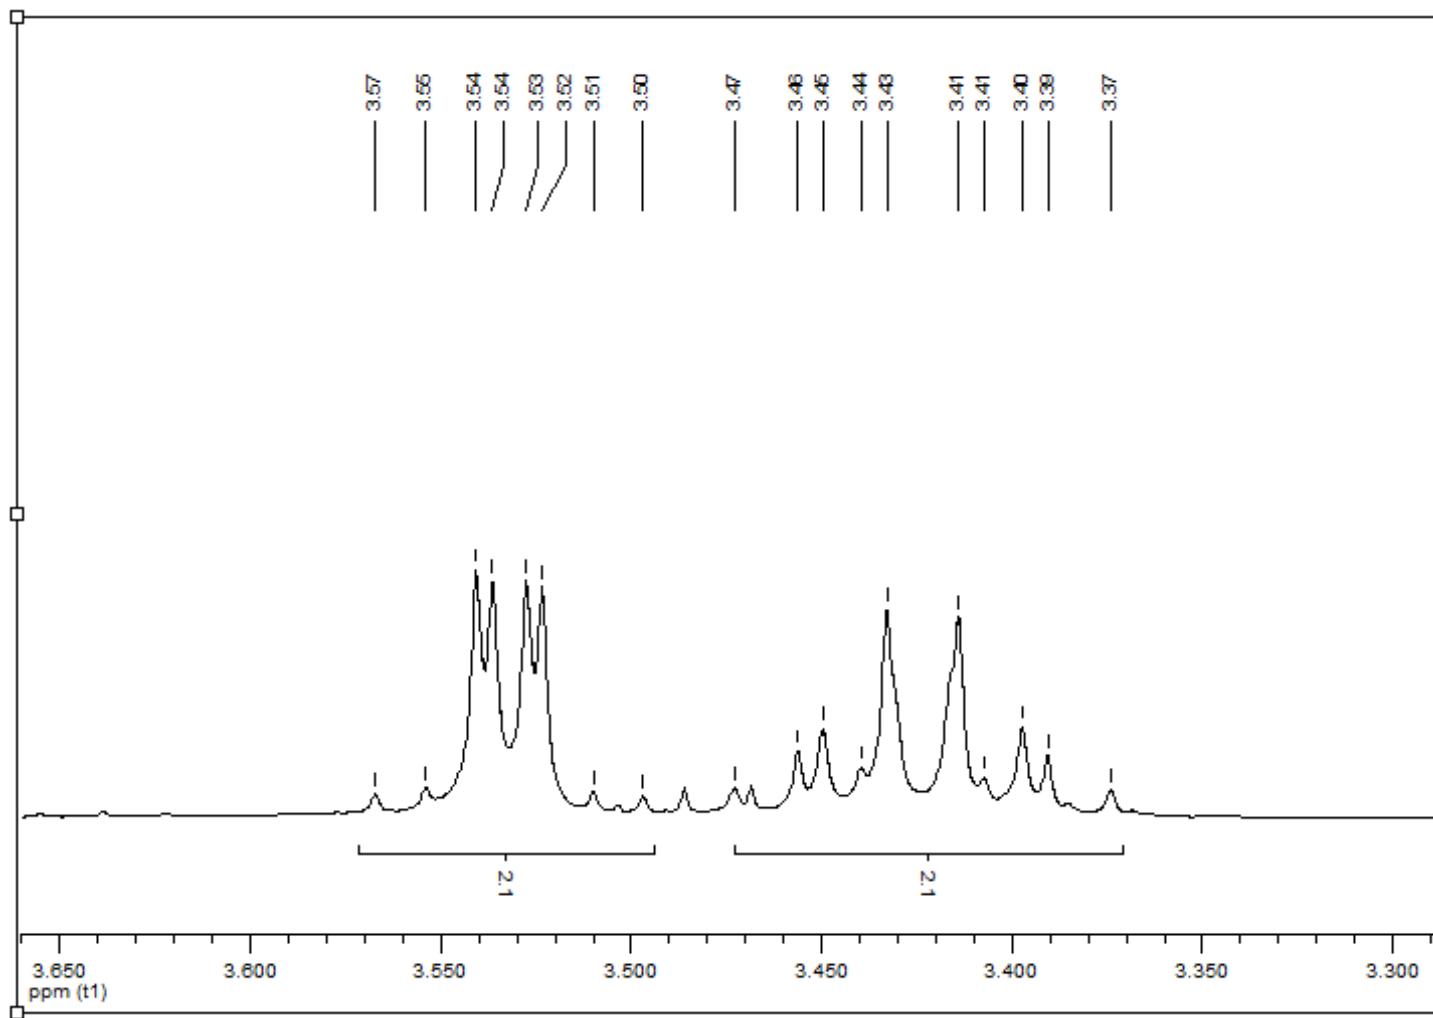

Figure S6. Cont.

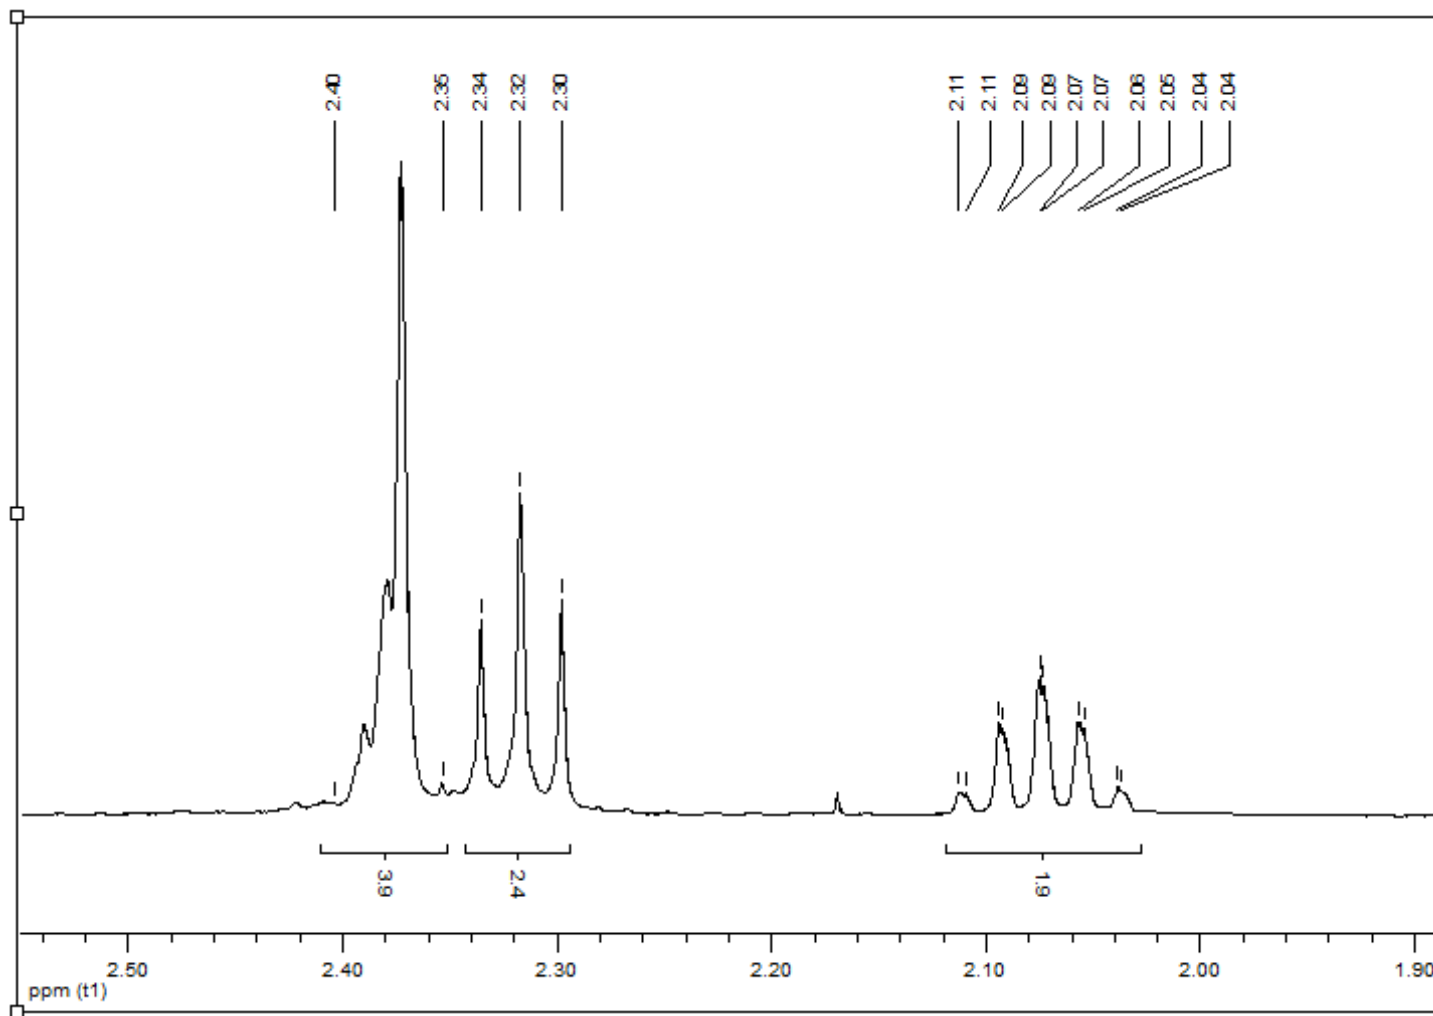

Figure S6. Cont.

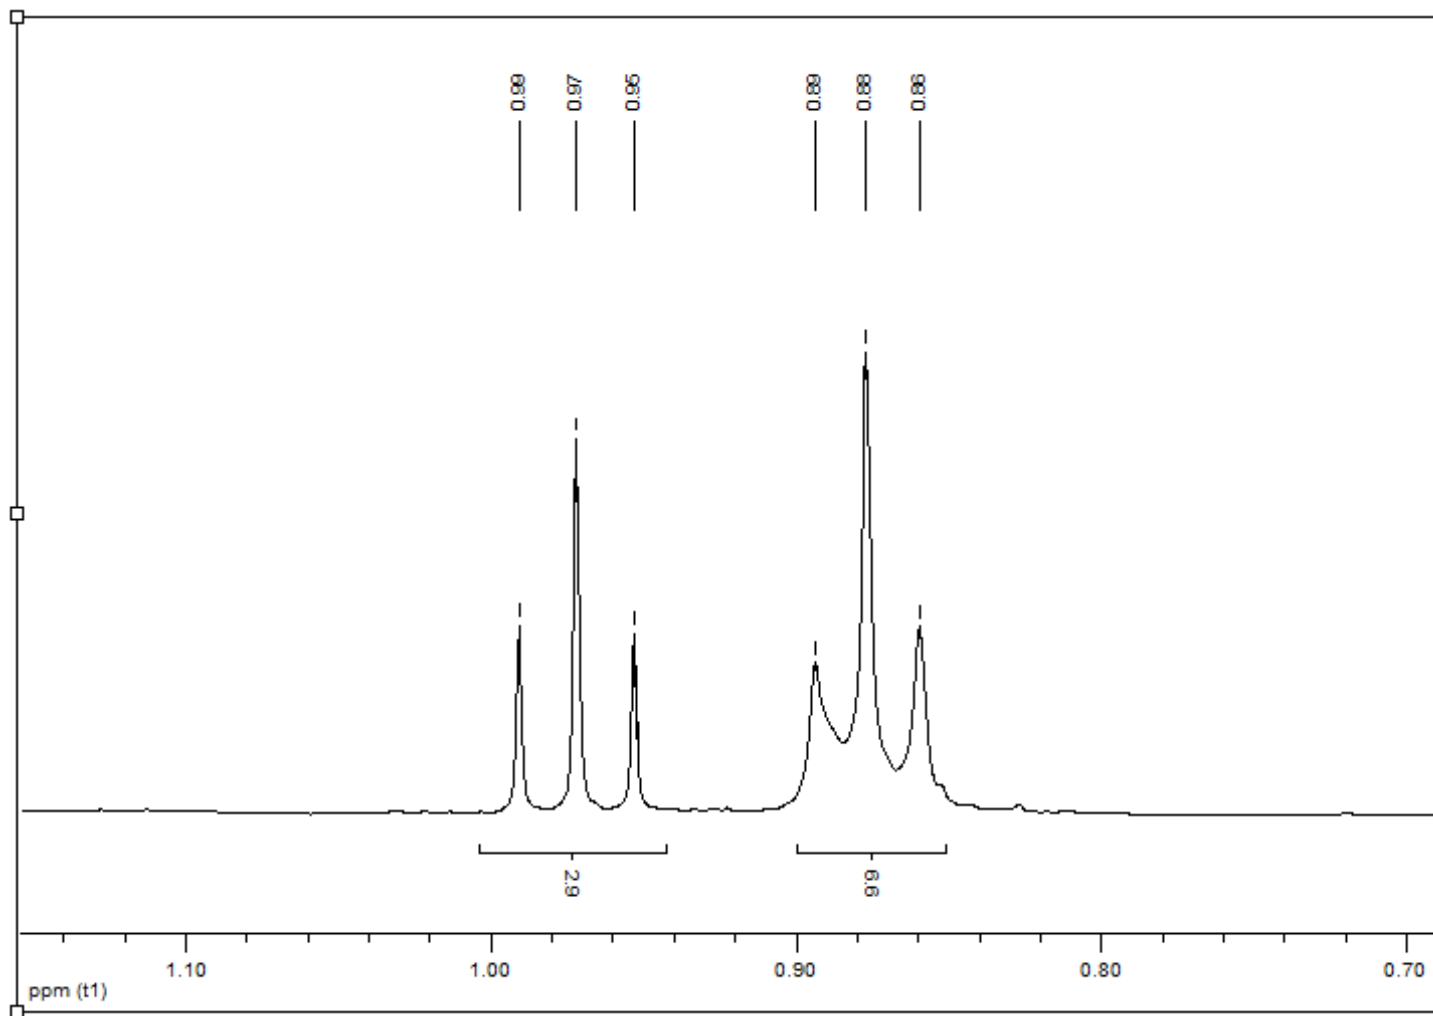

**Figure S6.** Expanded <sup>1</sup>H-NMR of compound 5b.

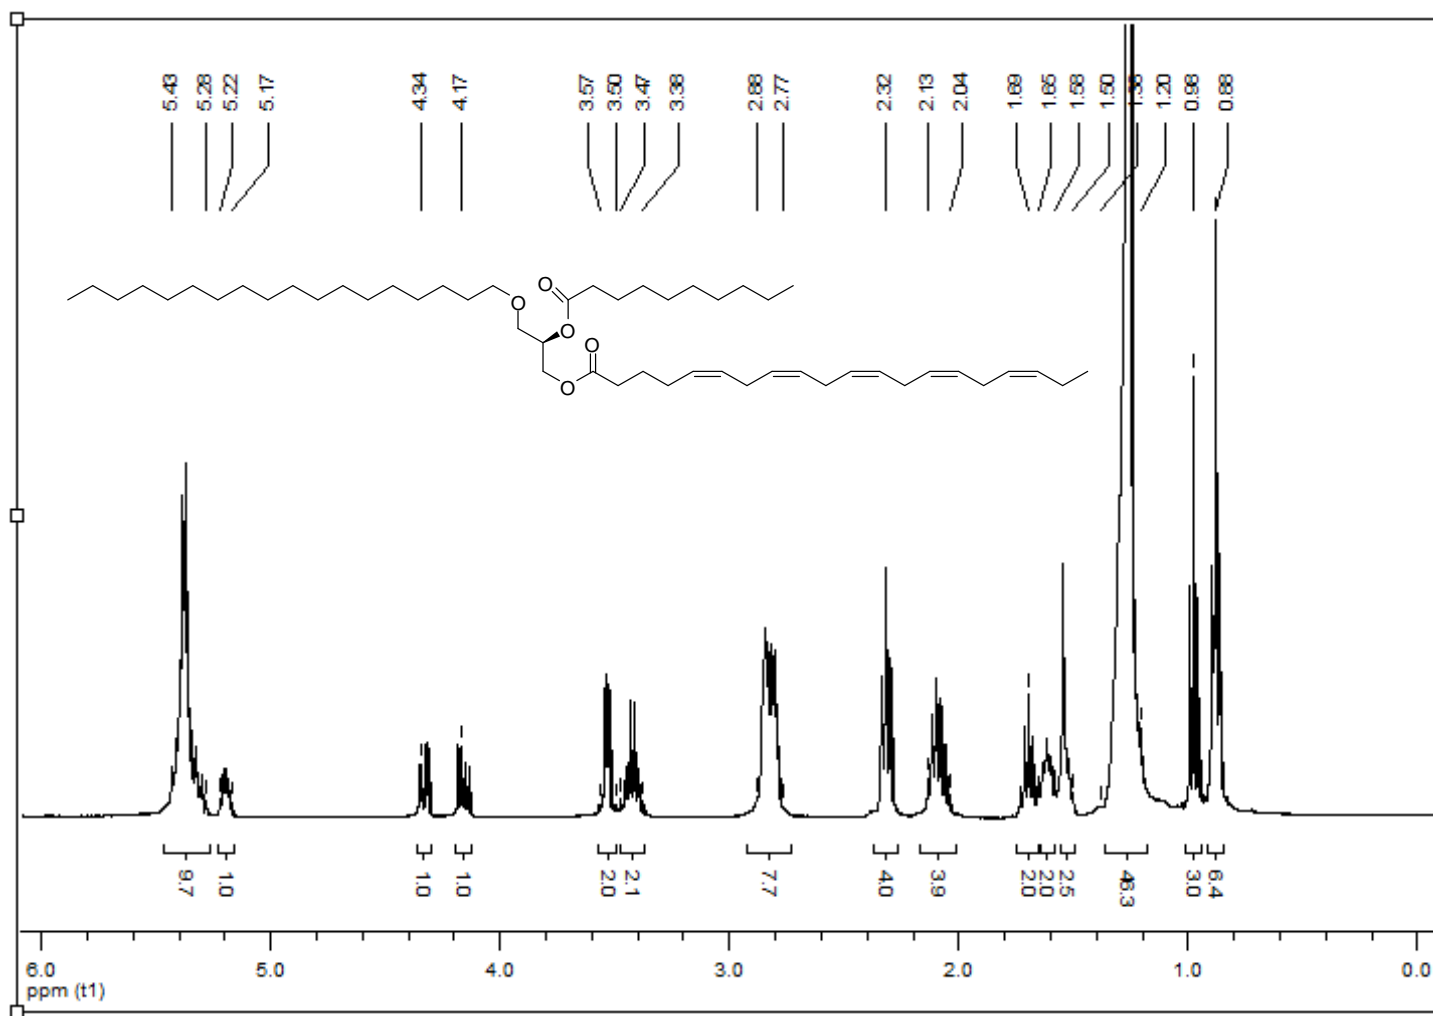

Figure S7. <sup>1</sup>H-NMR (CDCl<sub>3</sub>, 400 MHz) of compound **6c**.

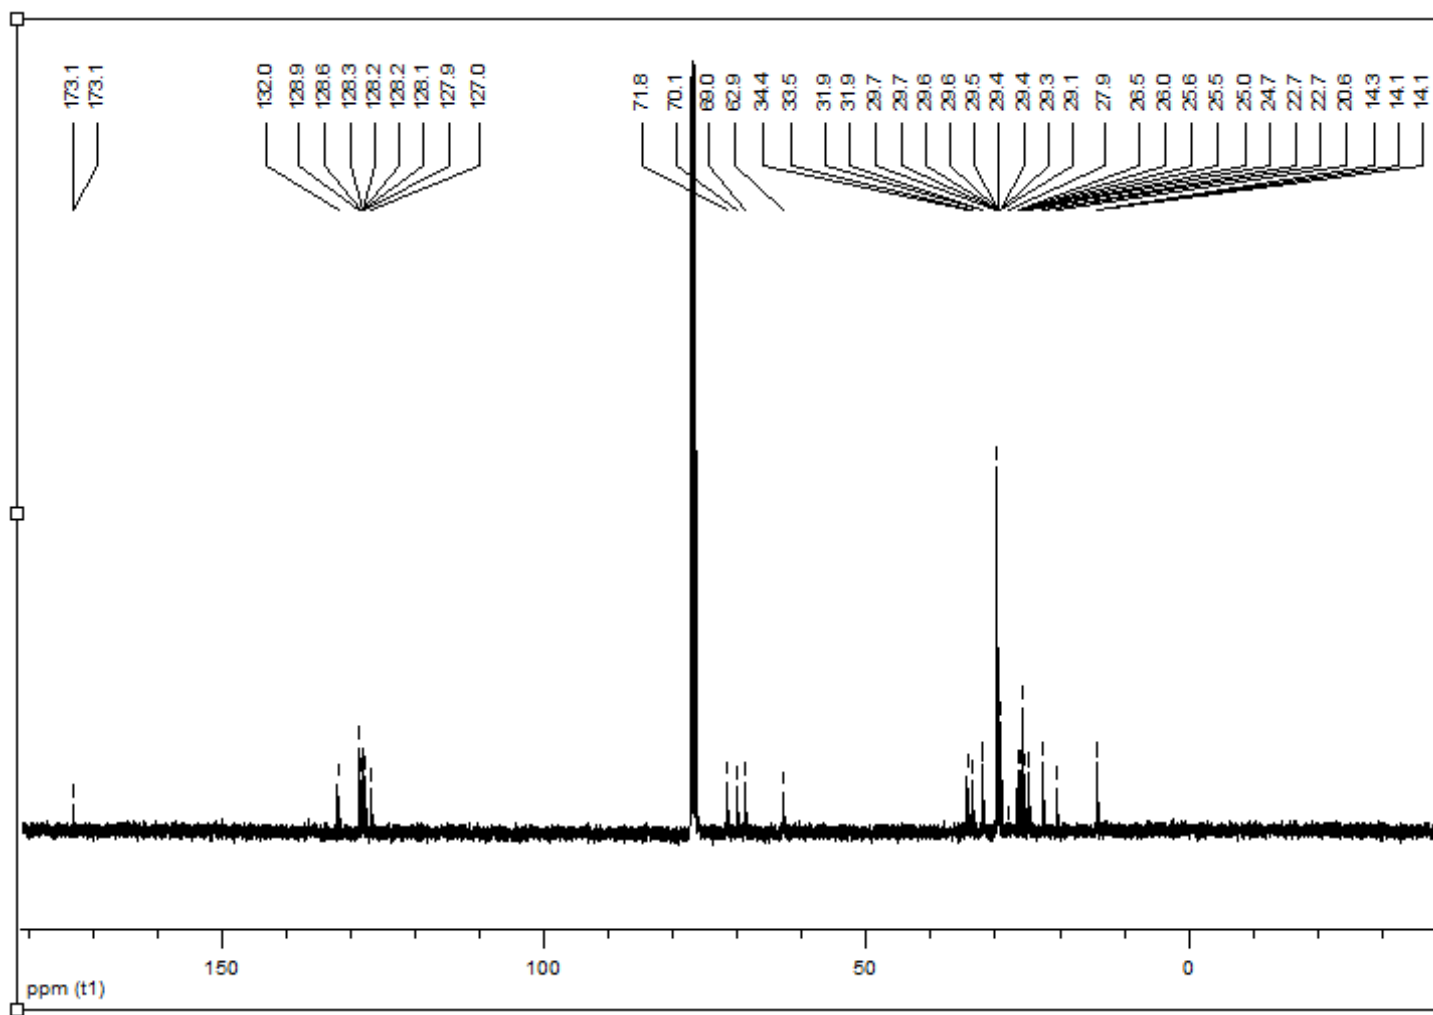

**Figure S8.** <sup>13</sup>C-NMR (CDCl<sub>3</sub>, 100 MHz) of compound 6c.

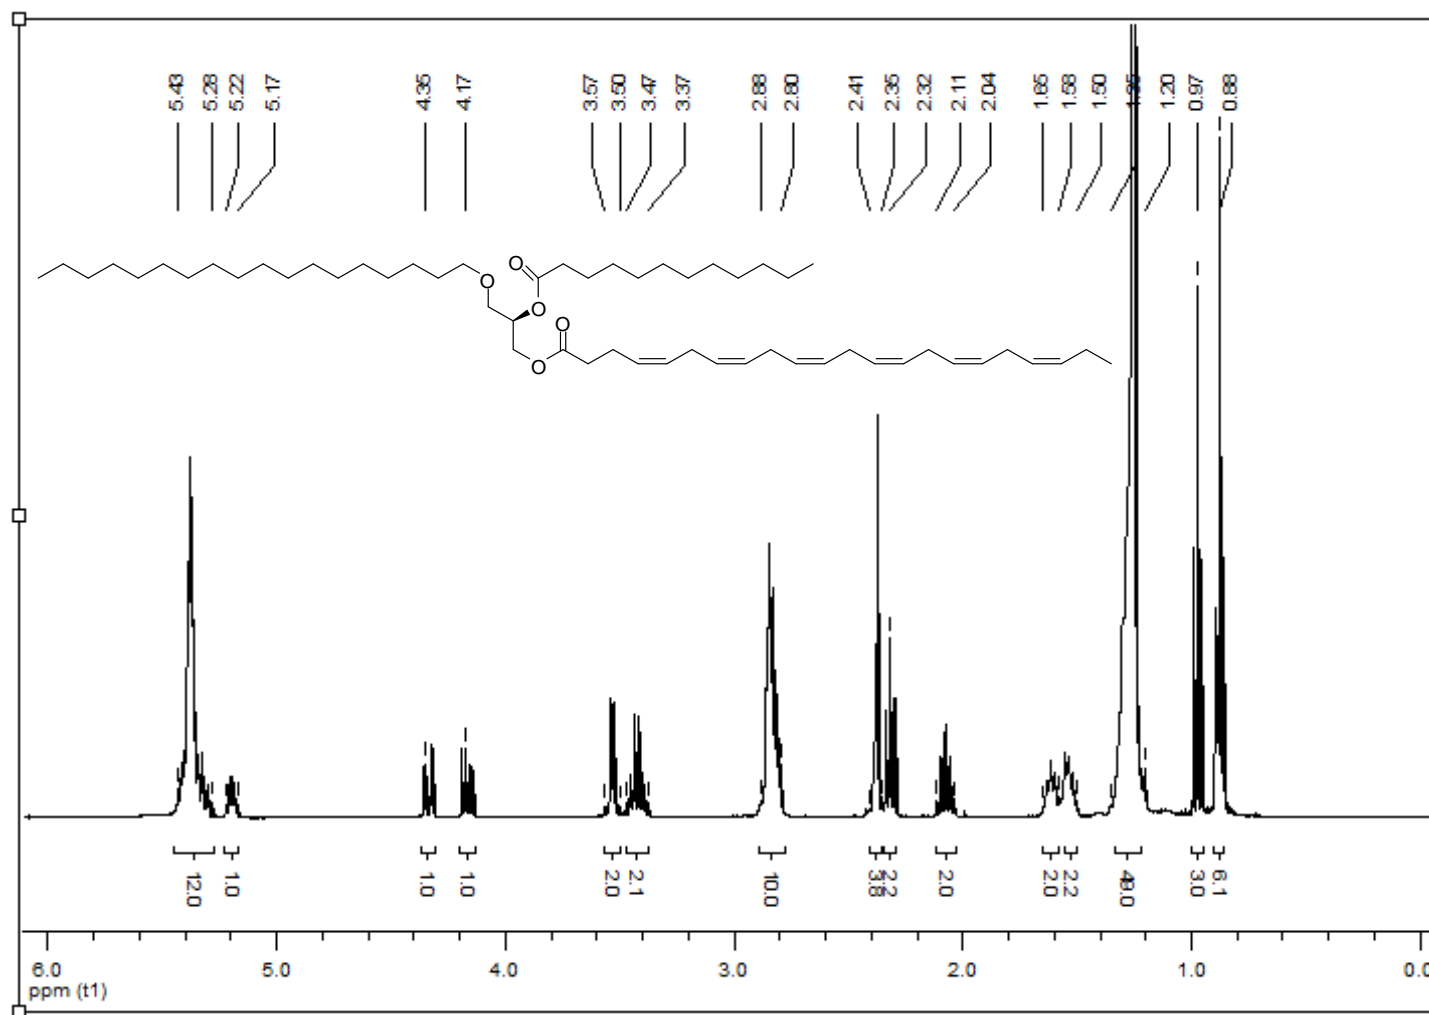

**Figure S9.** <sup>1</sup>H-NMR (CDCl<sub>3</sub>, 400 MHz) of compound 7d.



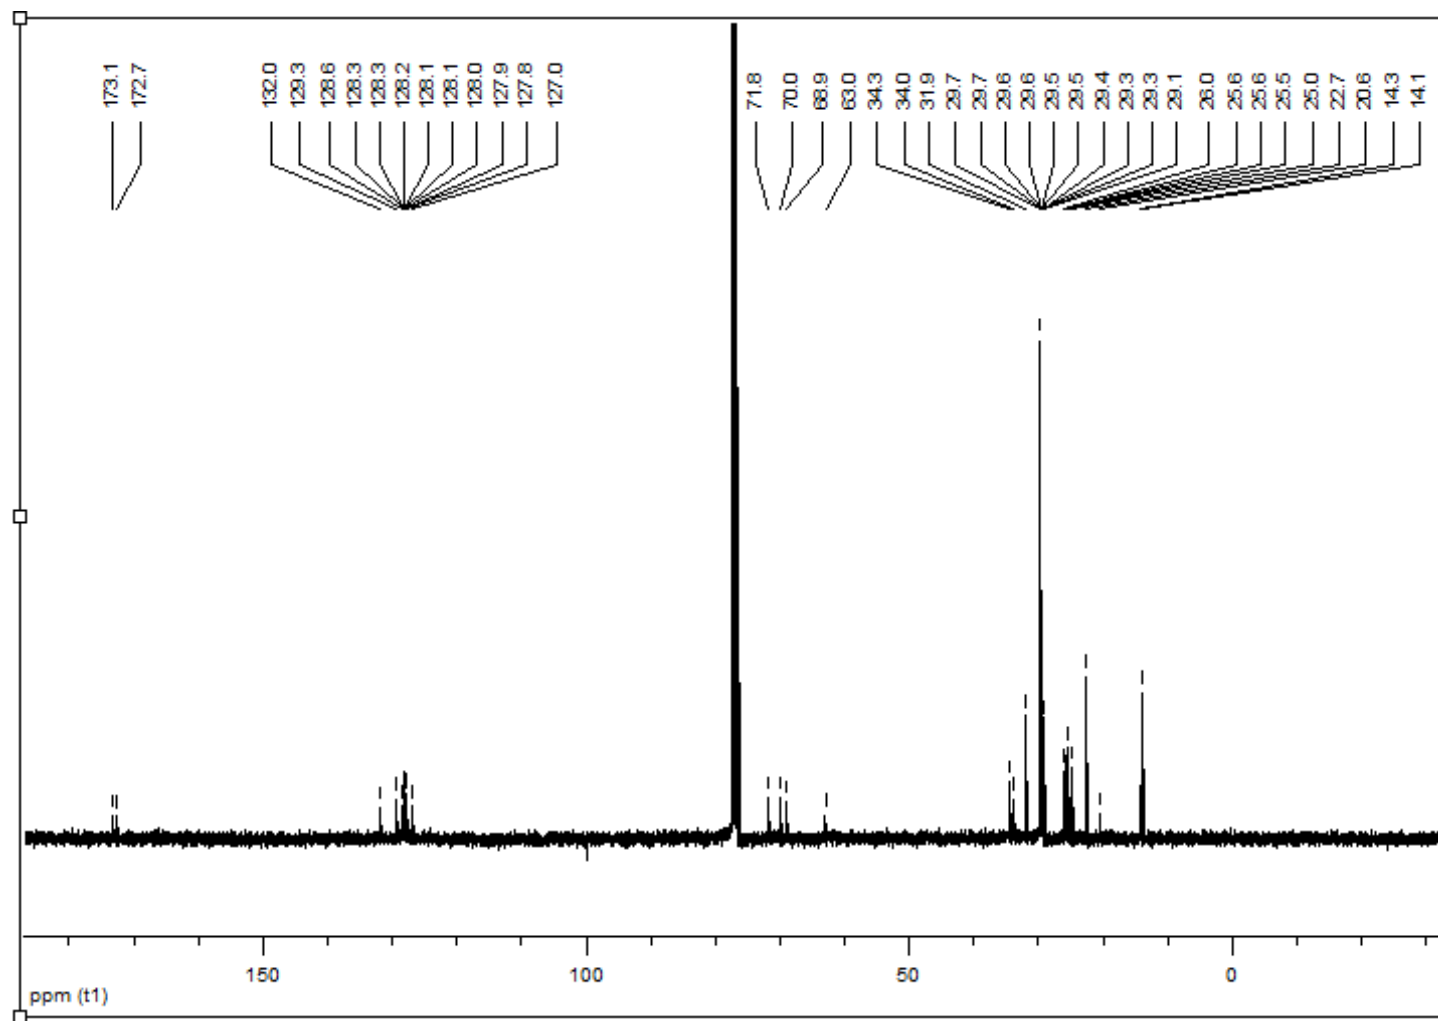

Figure S10. <sup>13</sup>C-NMR (CDCl<sub>3</sub>, 100 MHz) of compound 7d.

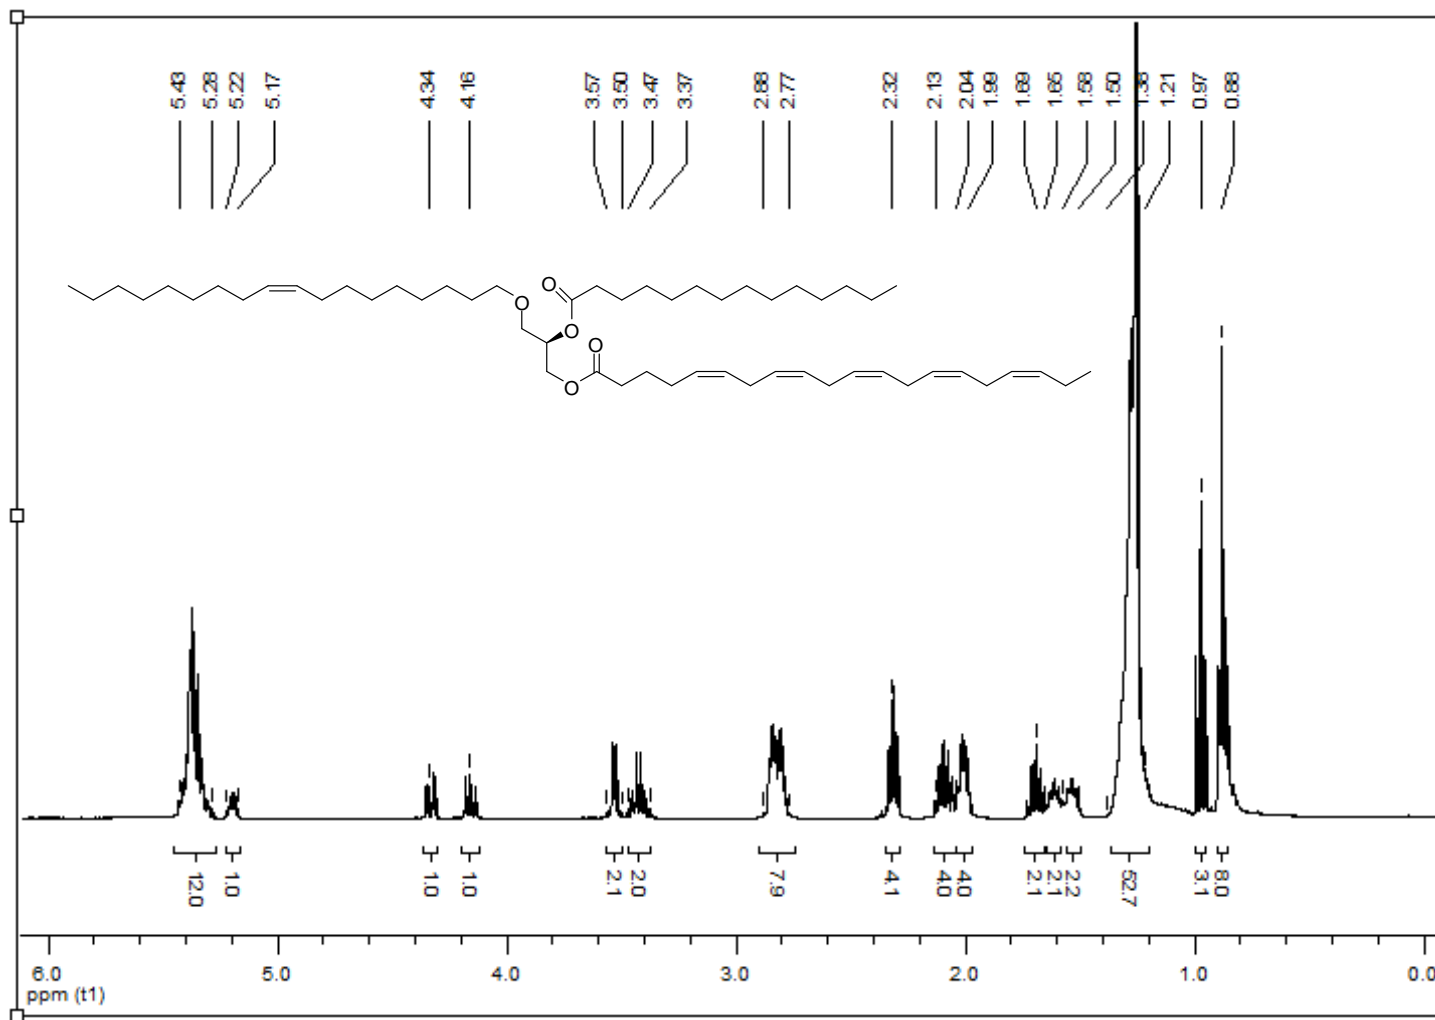

**Figure S11.**  $^1\text{H-NMR}$  ( $\text{CDCl}_3$ , 400 MHz) of compound **8e**.

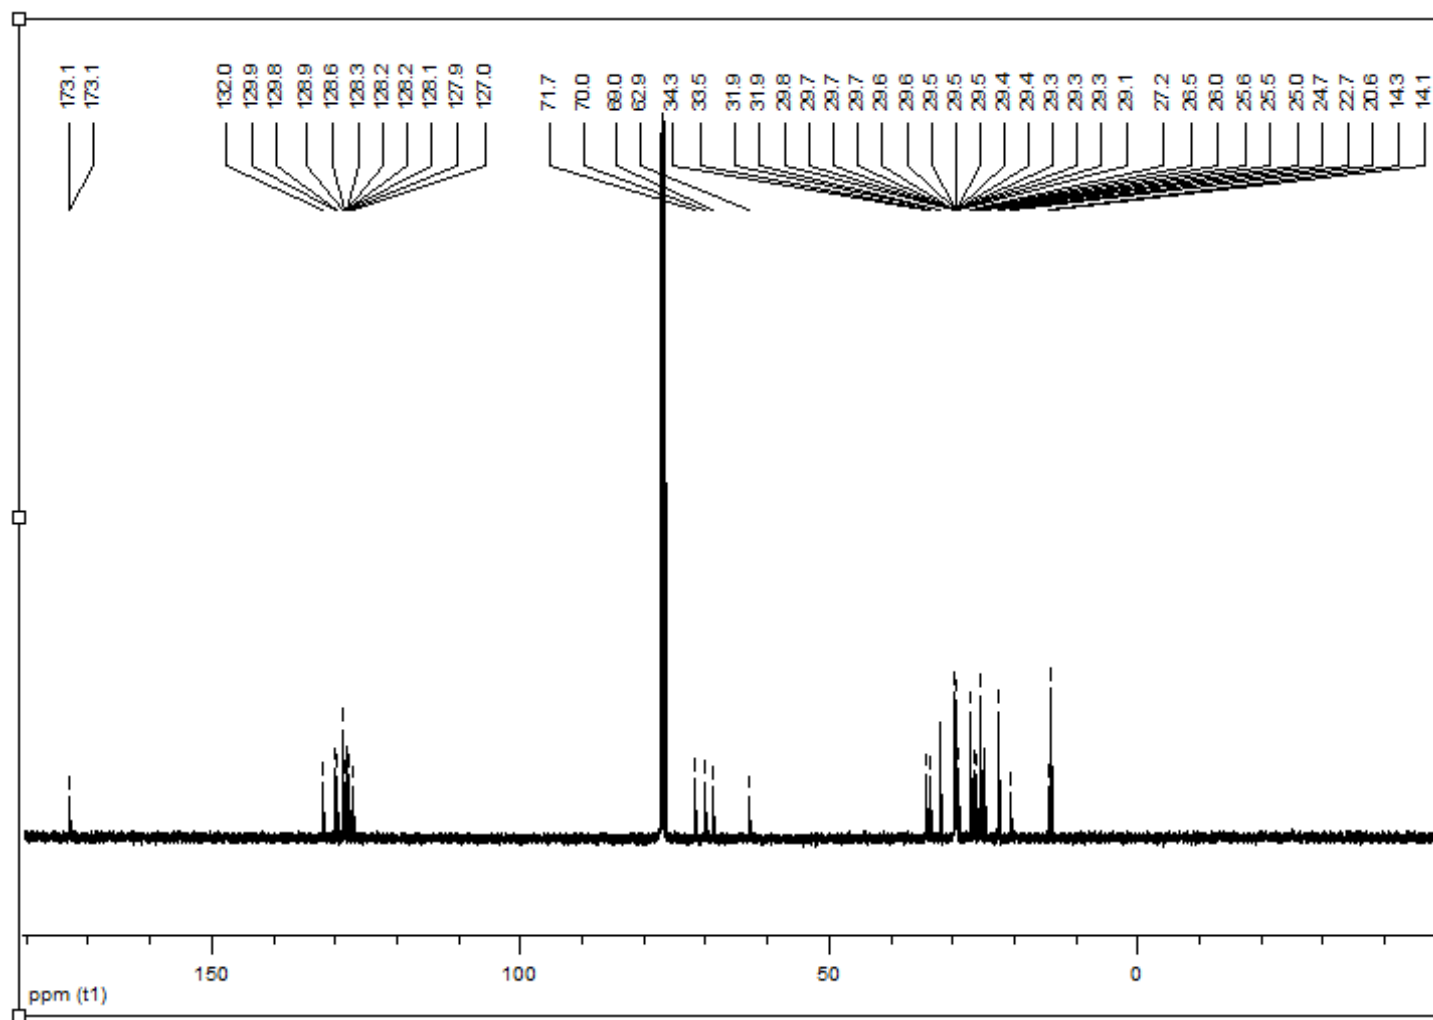

Figure S12.  $^{13}\text{C}$ -NMR ( $\text{CDCl}_3$ , 100 MHz) of compound **8e**.

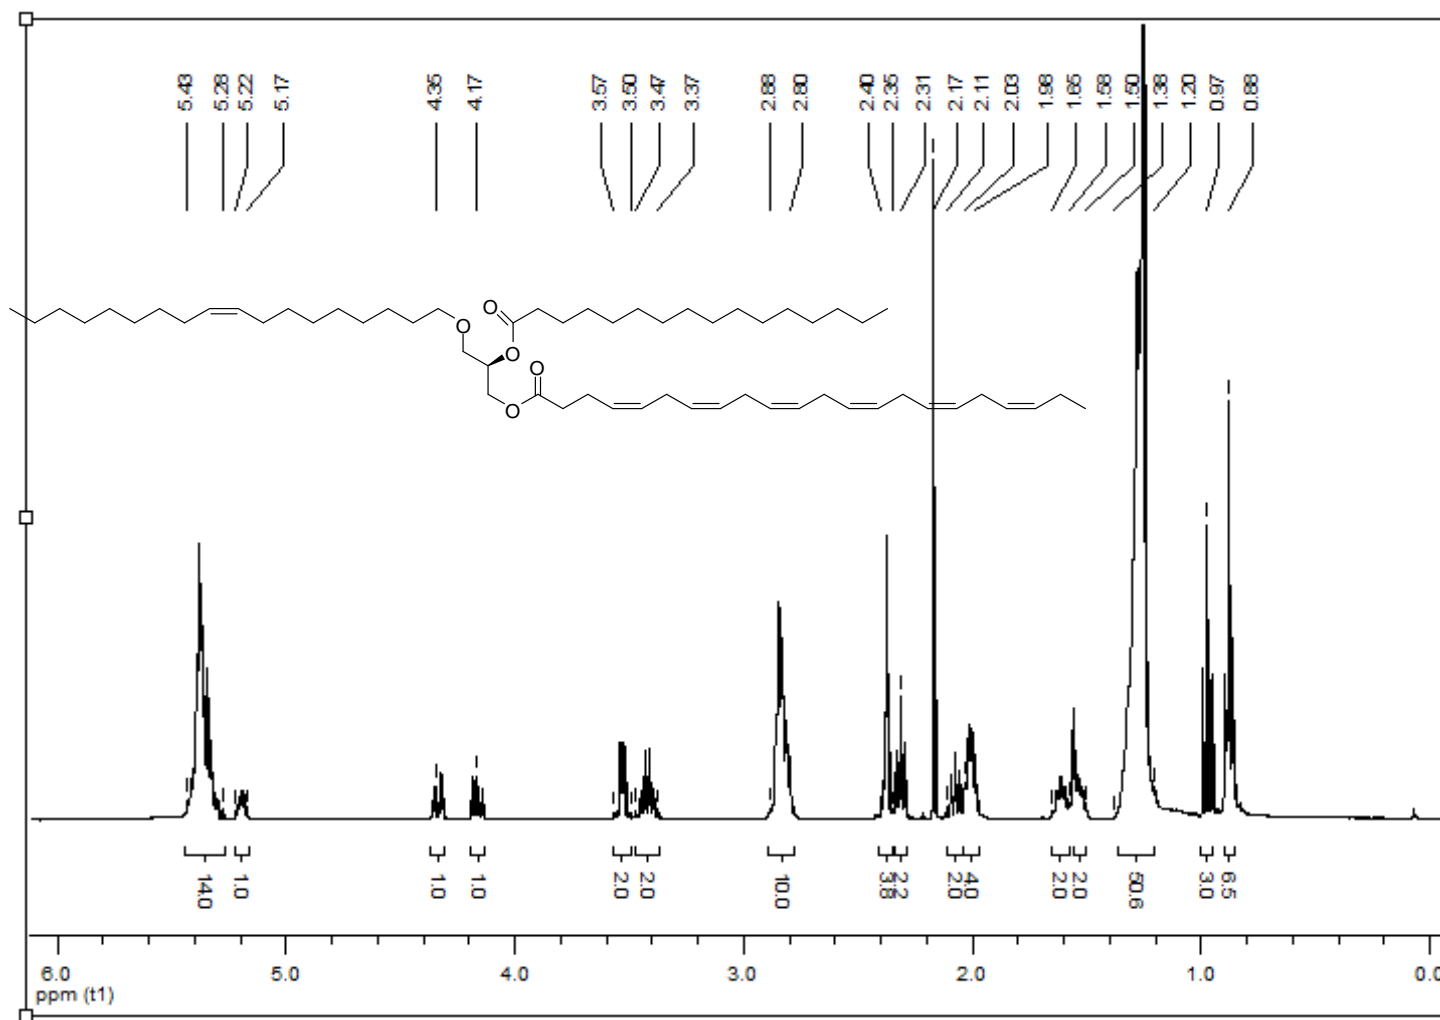

Figure S13. <sup>1</sup>H-NMR (CDCl<sub>3</sub>, 400 MHz) of compound 9f.

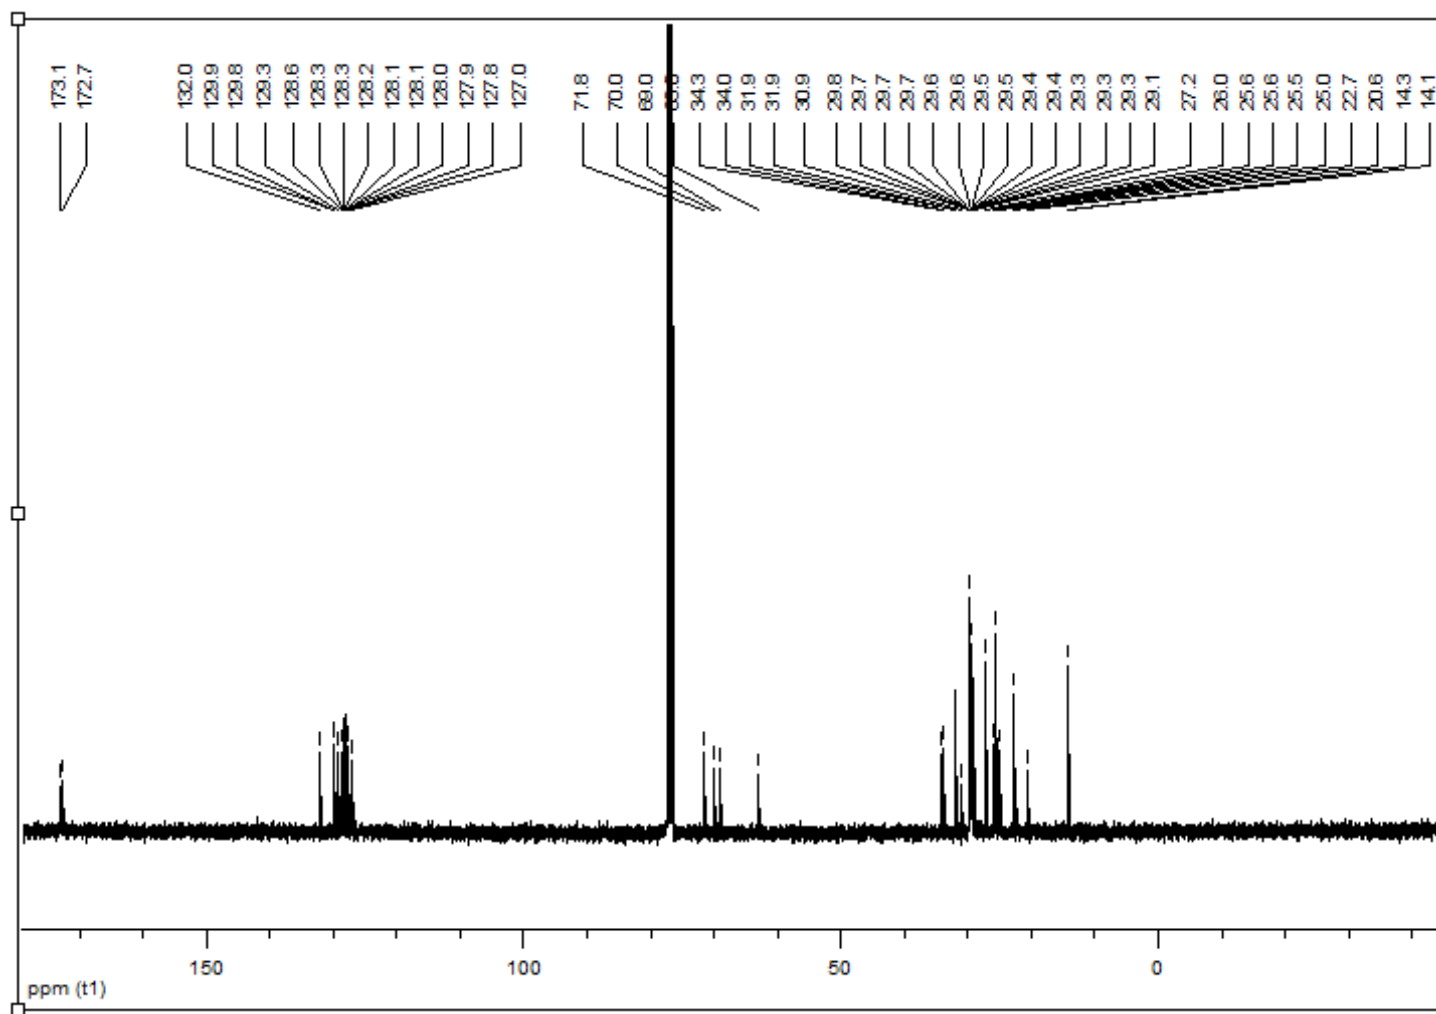

**Figure S14.**  $^{13}\text{C}$ -NMR ( $\text{CDCl}_3$ , 100 MHz) of compound **9f**.
